# Supplementary material
Source: Springer Nature journal article supplement (https://www.springermedizin.de/resource/supplementary/12877_2011_742_MOESM3_ESM.pdf/9440386)

# Mortality

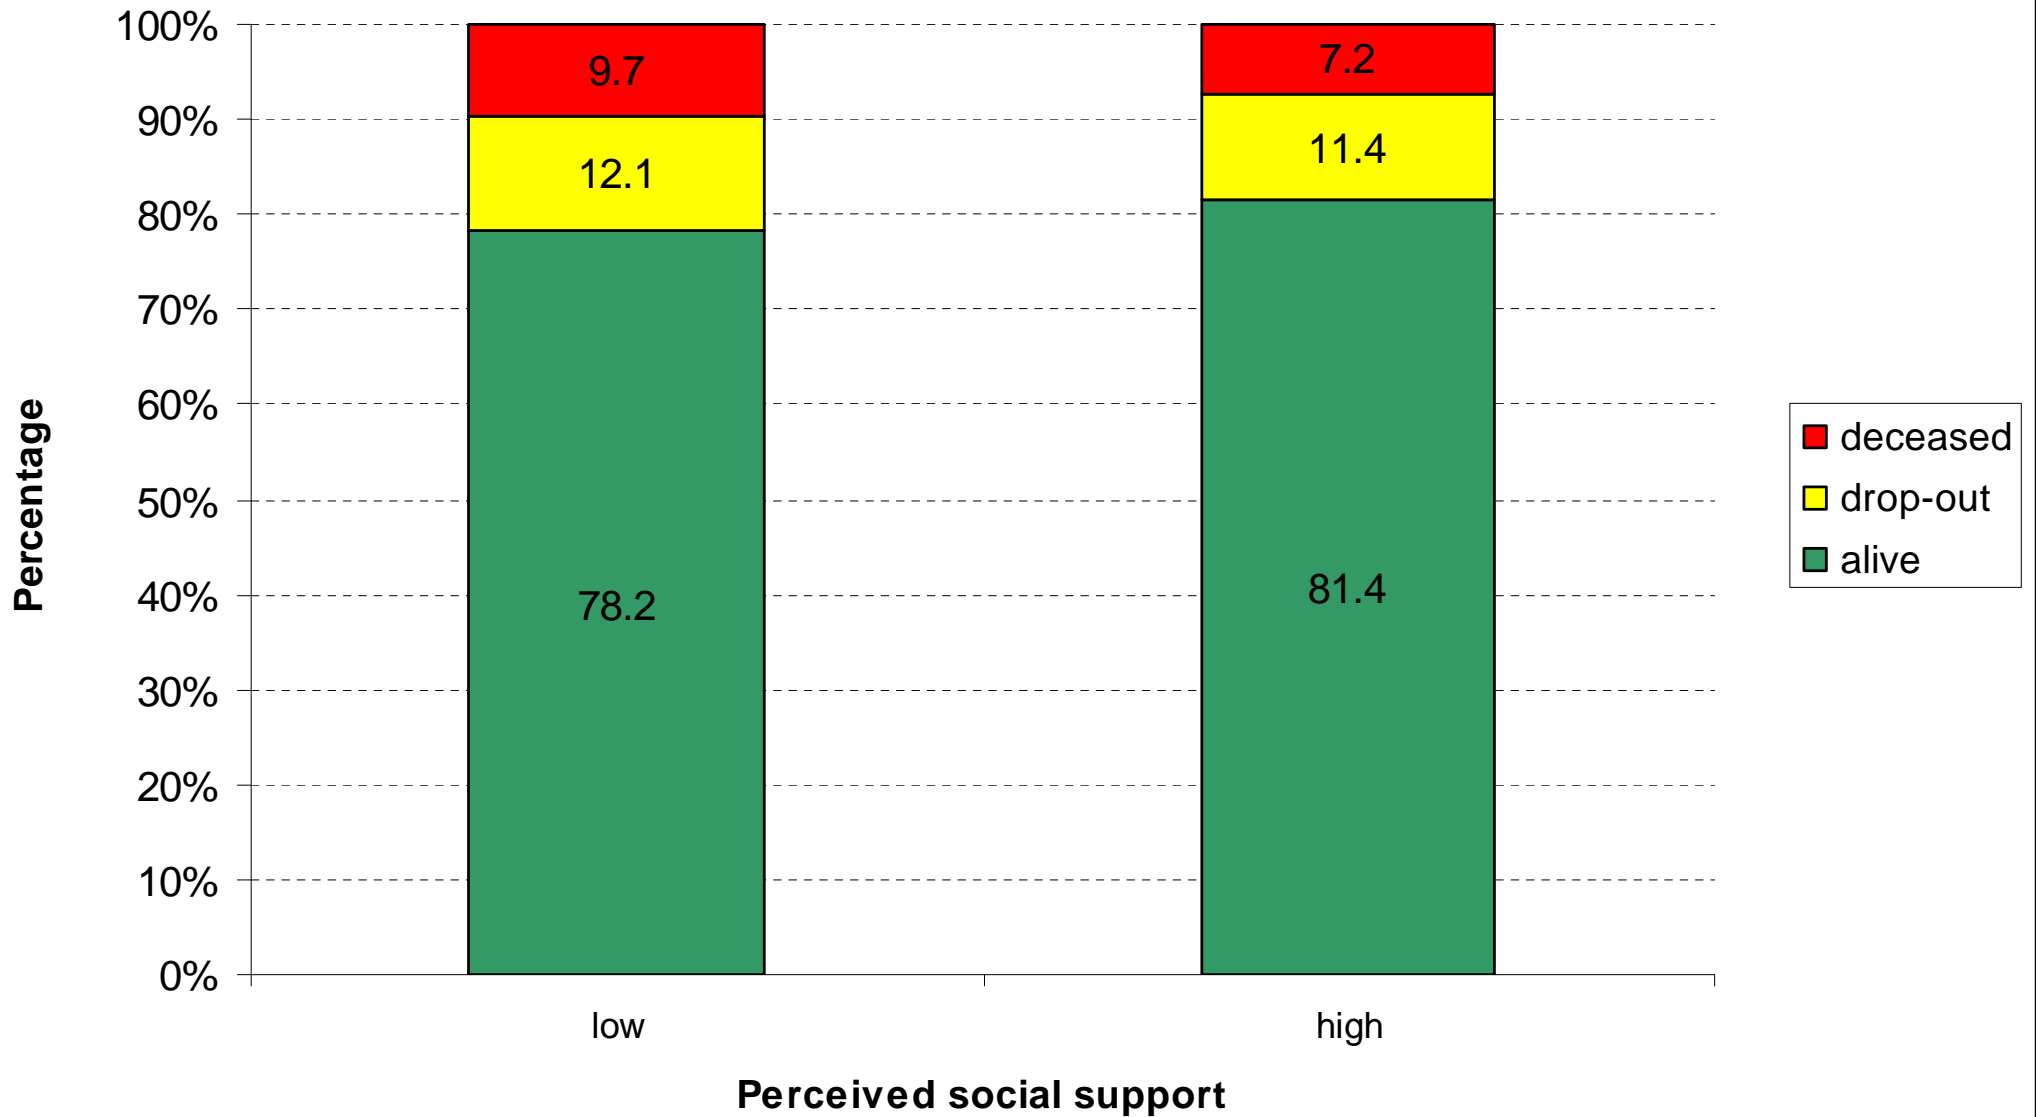

Supplement: MOESM3 [file 9440386]
